# Supplementary material for: Controlled self-assembly and photovoltaic characteristics of porphyrin derivatives on a silicon surface at solid–liquid interfaces
Source: Royal Society of Chemistry journal article supplement (doi:10.1039/c3sm53061b), 2014-01-01
Supplement: c3sm53061b.pdf [file c3sm53061b.pdf]

Figure S1. Synthesis route of ZnTPP and CuTPP

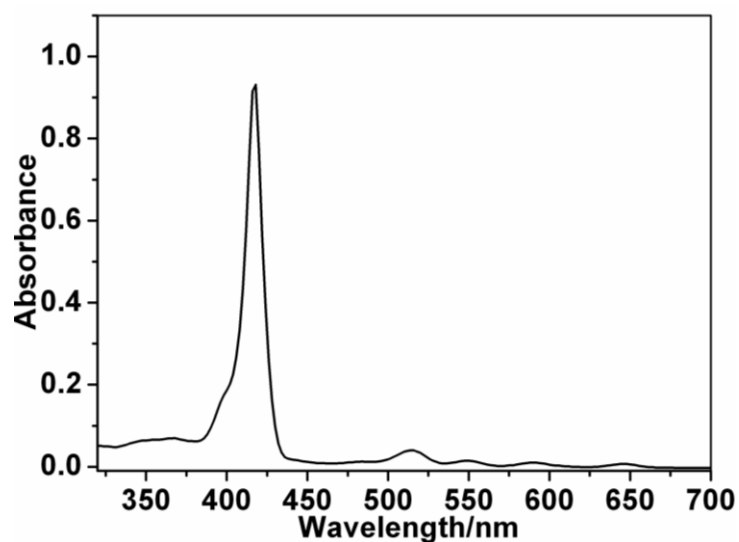

Figure S2. UV-visible absorption spectra of TPP in  $\text{CHCl}_3$

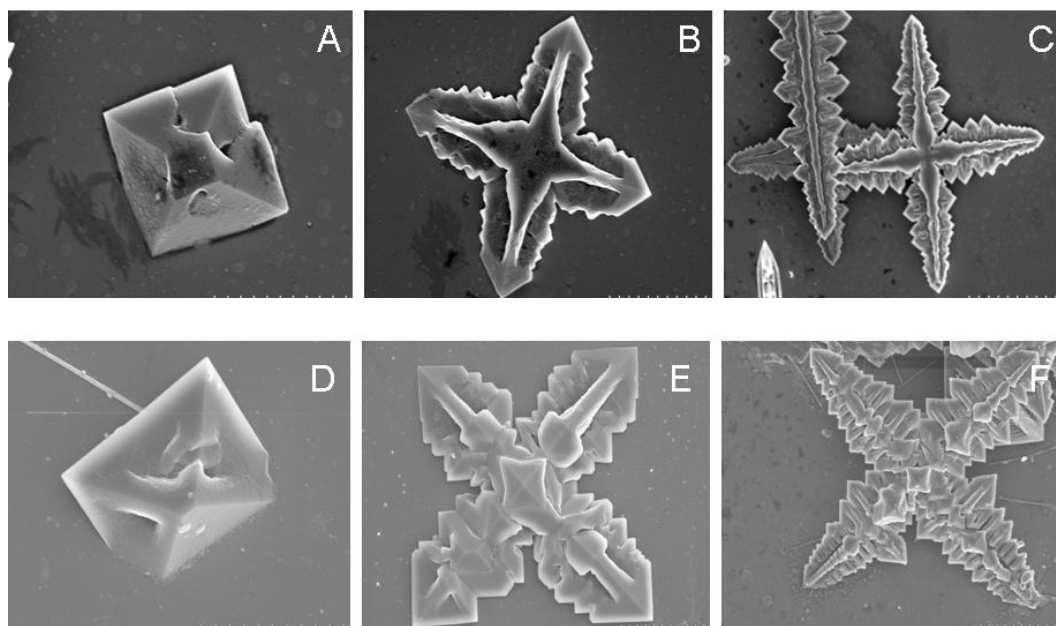

Figure S3. (A-C) SEM images of the four-leaf clover-shaped structures of ZnTPP sampled at various times during growth: 30 seconds (A), 5 minutes (B), 10 minutes (C). The size, size distribution, and morphology seen after 10 minutes is not significantly changed. (D-F) SEM images of the four-leaf clover-shaped structures of CuTPP sampled at various times during growth: 30 seconds (D), 5 minutes (E), 10 minutes (F). The size, size distribution, and morphology seen after 10 minutes is not significantly changed.

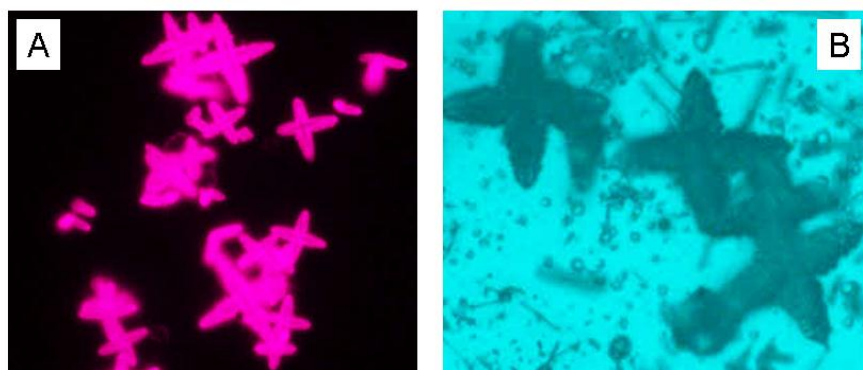

Figure S4 . Optical images of four-leaf clover-shaped nanostructures of ZnTPP (a) and CuTPP (b)

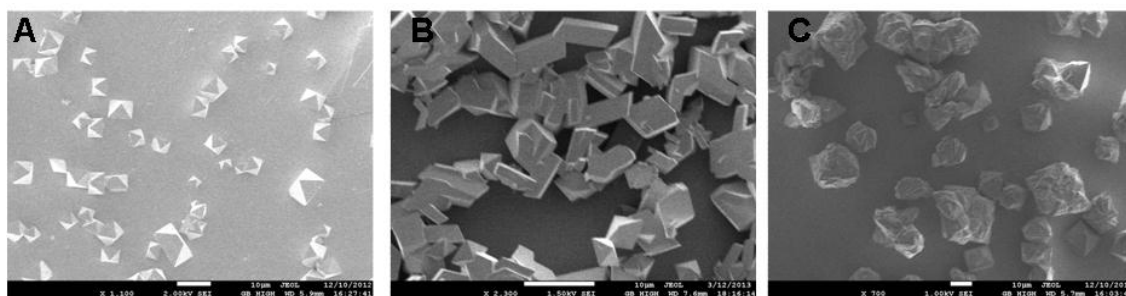

Figure S5. SEM images of the ZnTPP prepared in  $\text{CHCl}_3$ / *i*-PrOH (v/v 1:1) at the temperature of (a) 20 °C, (b) 40 °C, (c) 60 °C

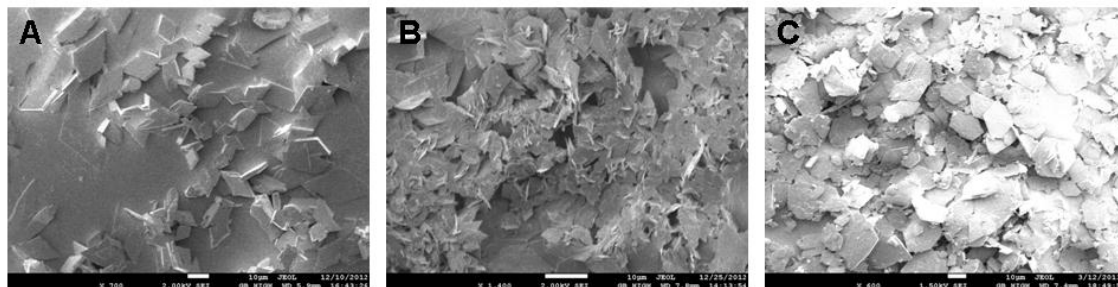

Figure S6. SEM images of the ZnTPP prepared in  $\text{CHCl}_3$ / cyclohexane (v/v 1:1) at the temperature of (a) 20 °C, (b) 40 °C, (c) 60 °C

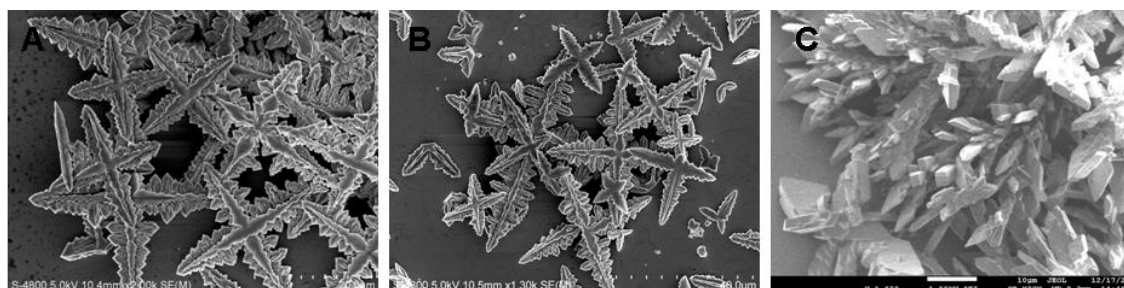

Figure S7. SEM images of the ZnTPP prepared in  $\text{CHCl}_3$ / MeOH (v/v 1:1) at the temperature of (a) 20 °C, (b) 40 °C, (c) 60 °C

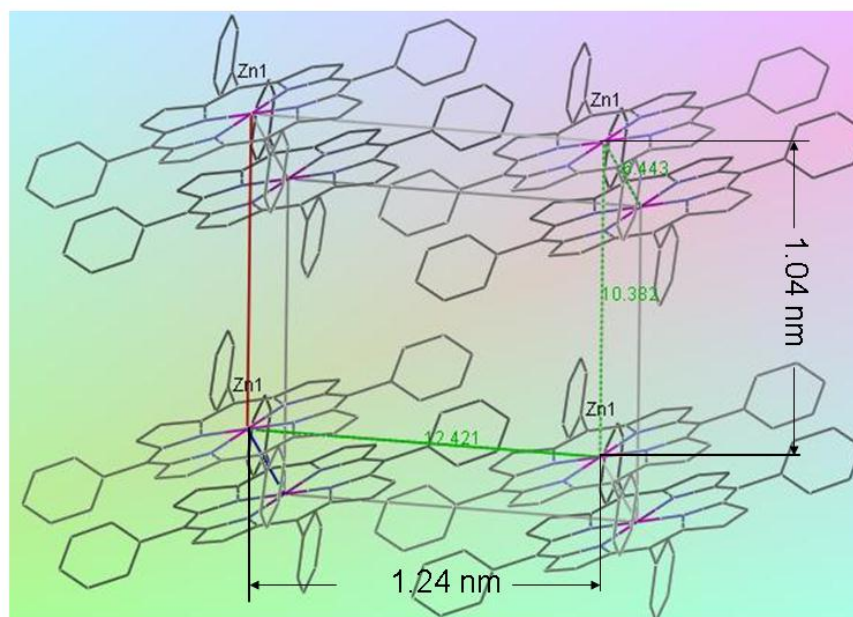

Figure S8 . Schematic representation of the unit cell in the aggregate of ZnTPP (CCDC, Refcode ZZZTAY02)

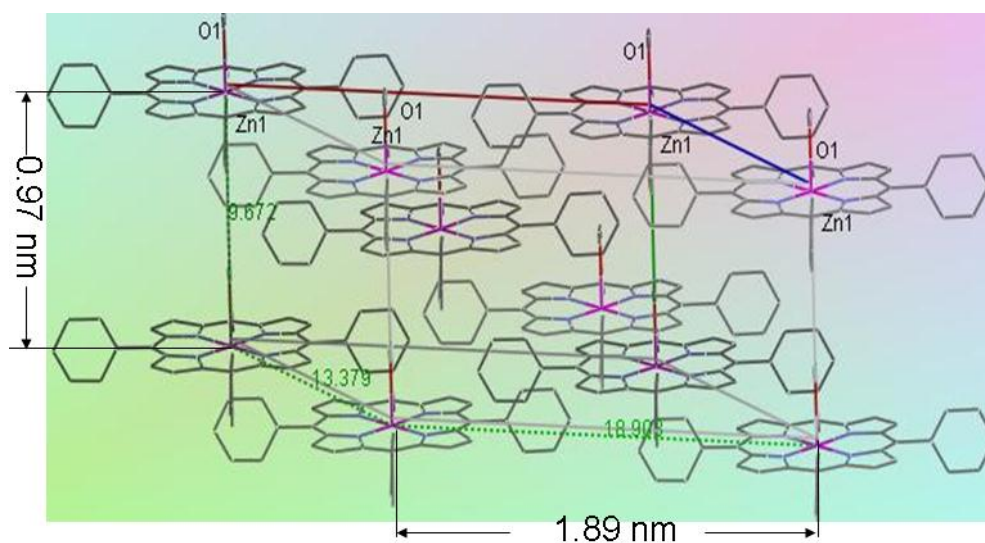

Figure S9 . Schematic representation of the unit cell in the aggregate of ZnTPP (CCDC, Refcode ZNTPOR03)

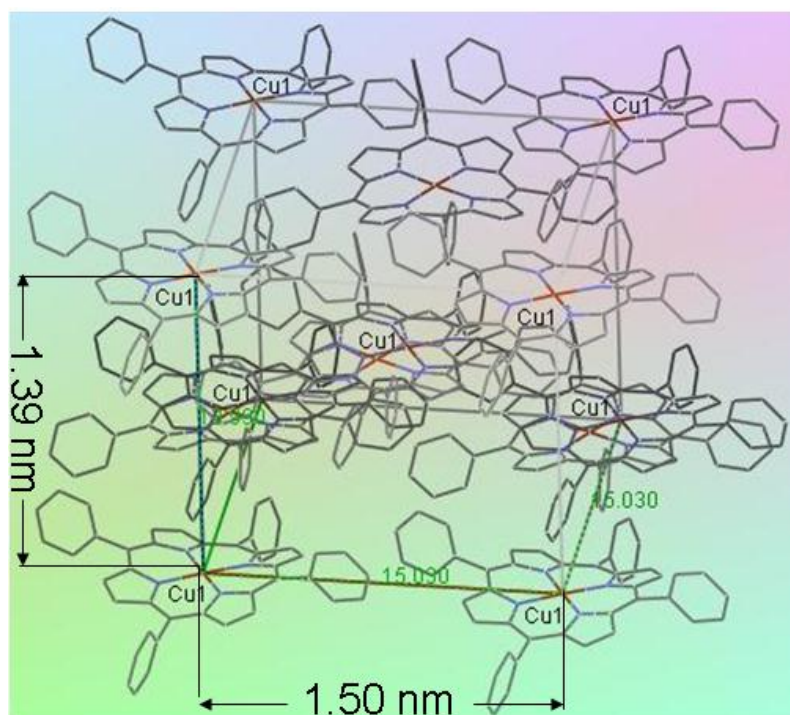

Figure S10. Schematic representation of the unit cell in the aggregate of CuTPP (CCDC Refcode: CUTPOR)

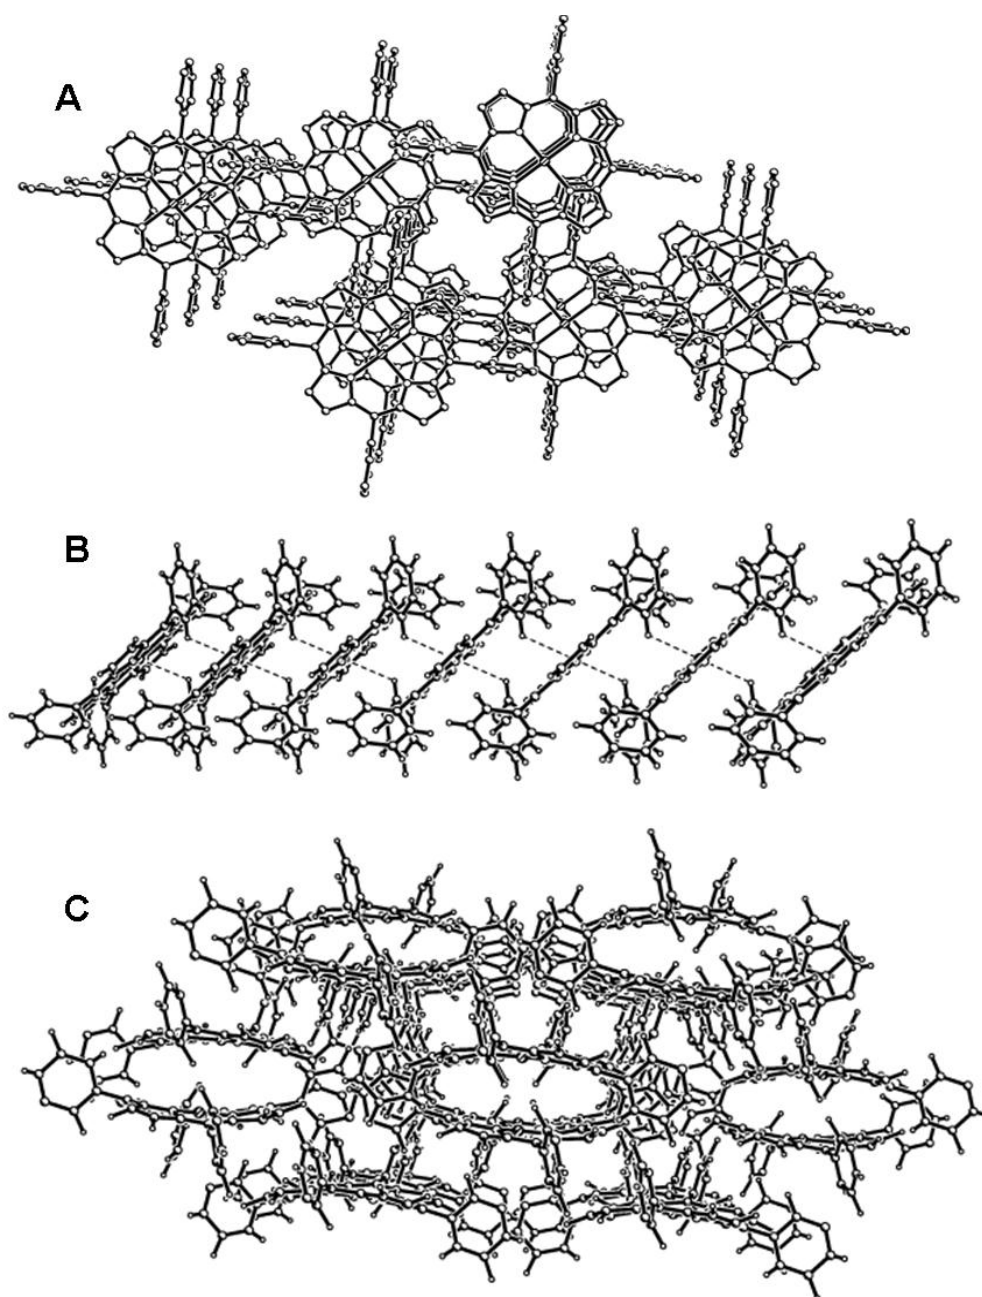

Figure S11. Packing-diagram representation of the single crystal structure of (A) CCDC, Refcode ZZZTAY02, (B) CCDC, Refcode ZNTPOR03, (C) CCDC, Refcode CUTPOR showing  $\pi$ - $\pi$  interaction between adjacent porphyrin layers

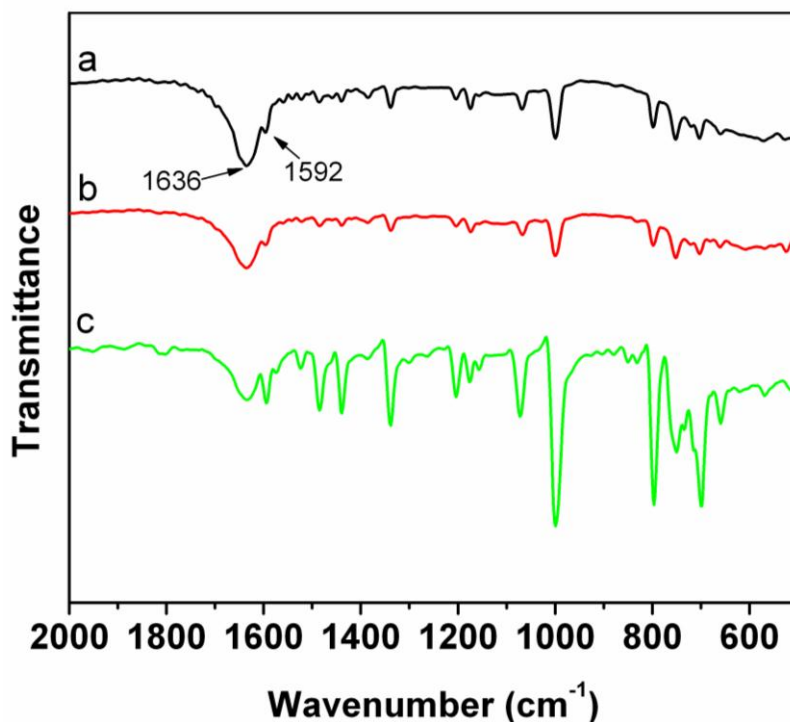

Figure S12. IR spectra of aggregates of compound ZnTPP with four-leaf clover-shaped structures formed in  $\text{CHCl}_3/\text{MeOH}$  (v/v 1:1) (a); Octahedrons formed in  $\text{CHCl}_3/\text{i-PrOH}$  (v/v 1:1) (b); Nanoslices formed in  $\text{CHCl}_3/\text{cyclohexane}$  (v/v 1:1) (c) in the region 400-4000  $\text{cm}^{-1}$  with 2  $\text{cm}^{-1}$  resolution.

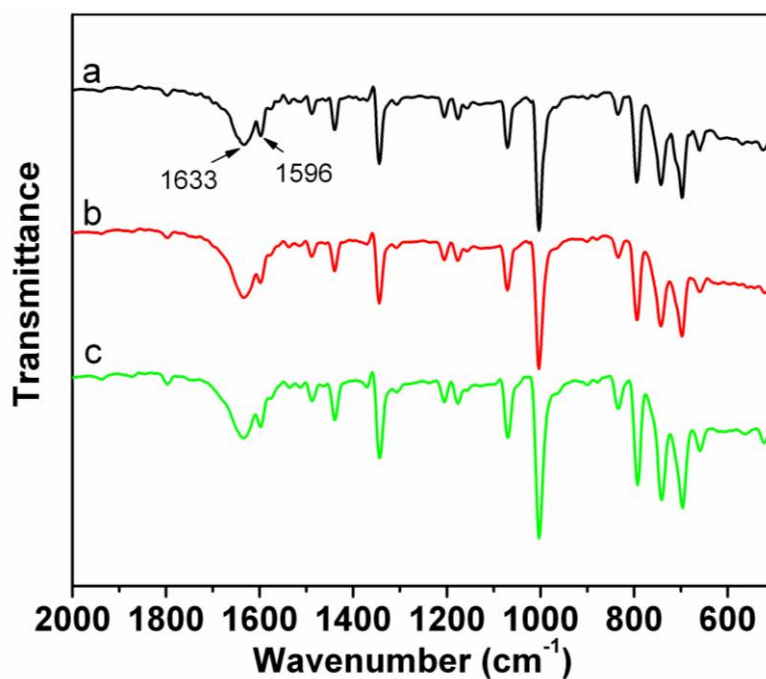

Figure S13. IR spectra of aggregates of compound CuTPP with four-leaf clover-shaped structures formed in  $\text{CHCl}_3/\text{MeOH}$  (v/v 1:1) (a); Octahedrons formed in  $\text{CHCl}_3/\text{i-PrOH}$  (v/v 1:1) (b); Nanorods formed in  $\text{CHCl}_3/\text{cyclohexane}$  (v/v 1:1) (c) in the region 400-4000  $\text{cm}^{-1}$  with 2  $\text{cm}^{-1}$  resolution.
